# Supplementary material
Source: PubMed Central journal article supplement (PMC1904146)

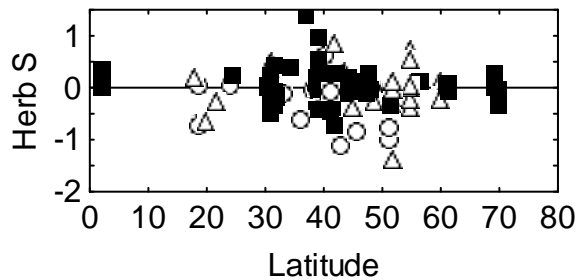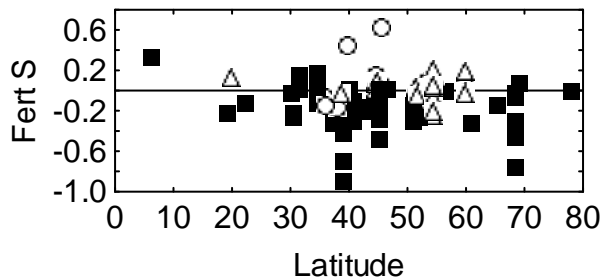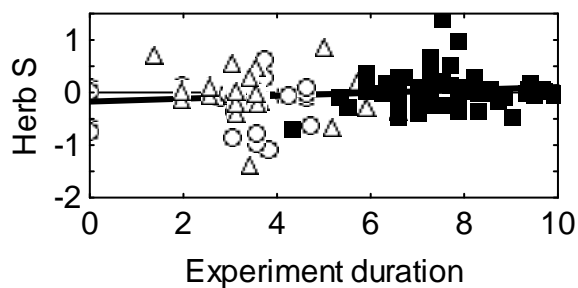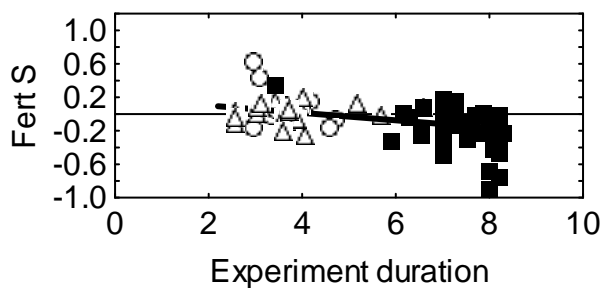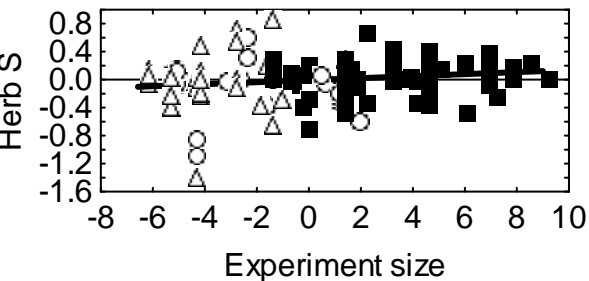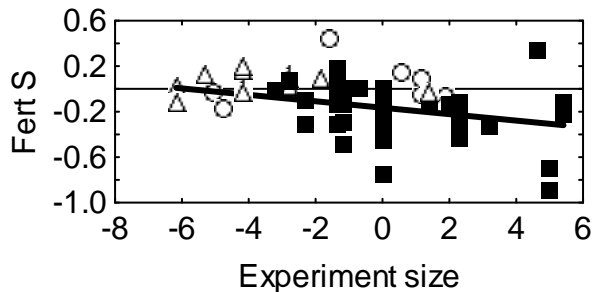

Supplement: pnas_0701918104_2.pdf [file pnas_0701918104_2.pdf]

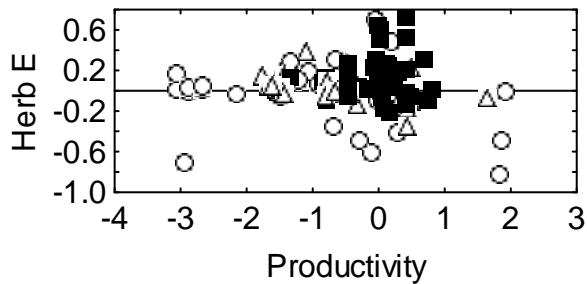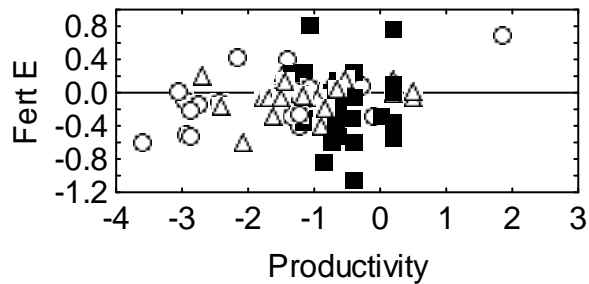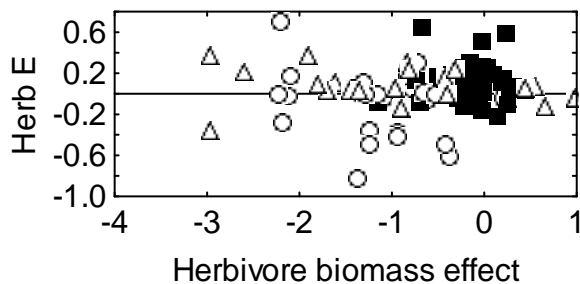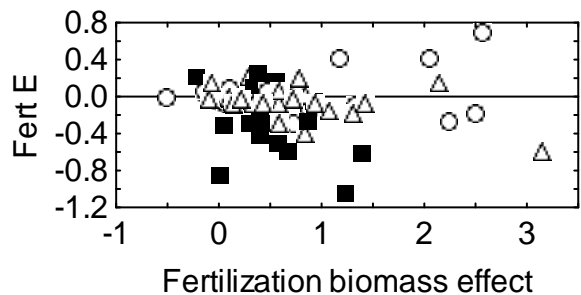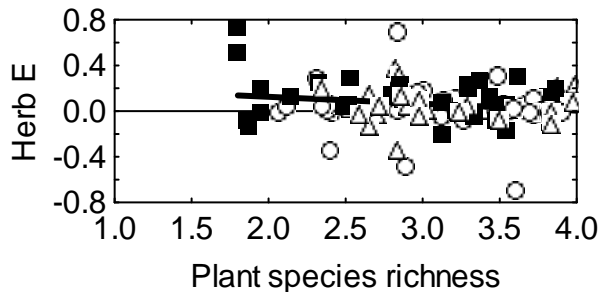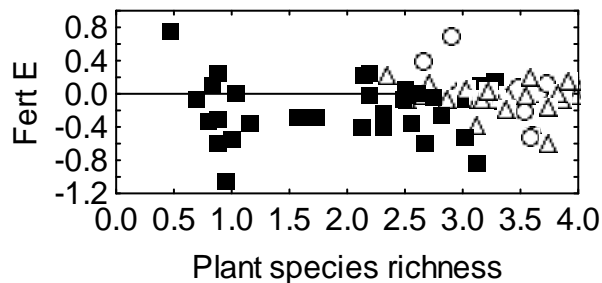

Supplement: pnas_0701918104_3.pdf [file pnas_0701918104_3.pdf]

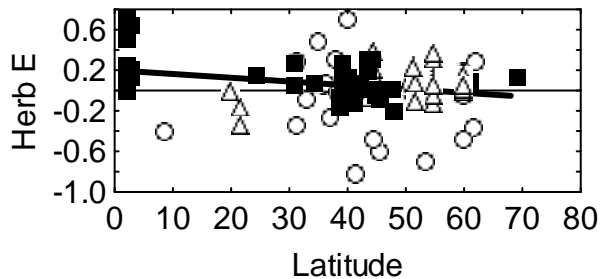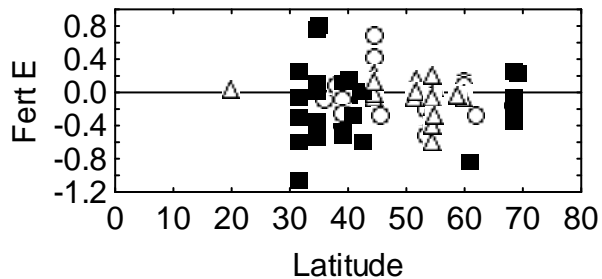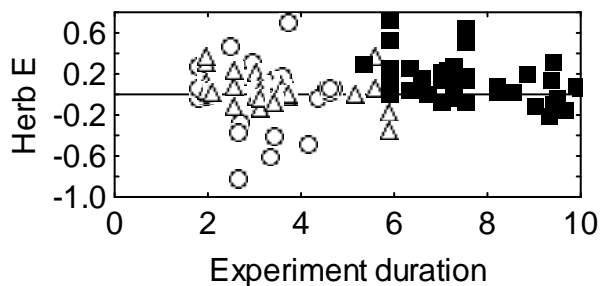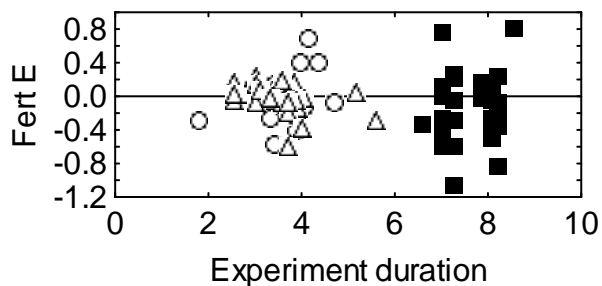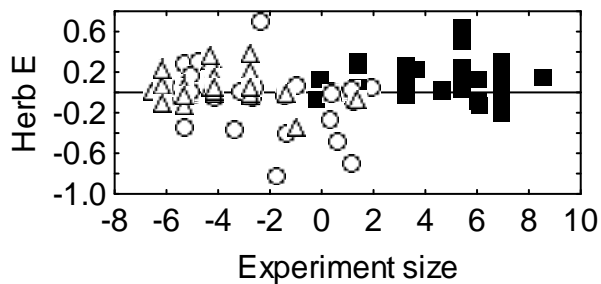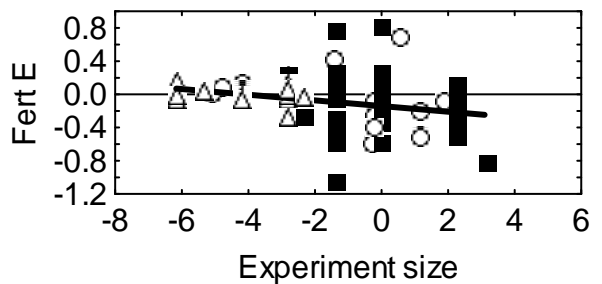

Supplement: pnas_0701918104_4.pdf [file pnas_0701918104_4.pdf]

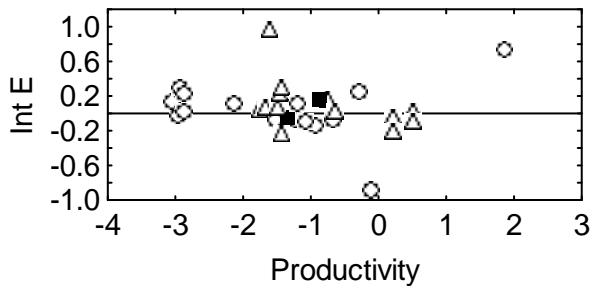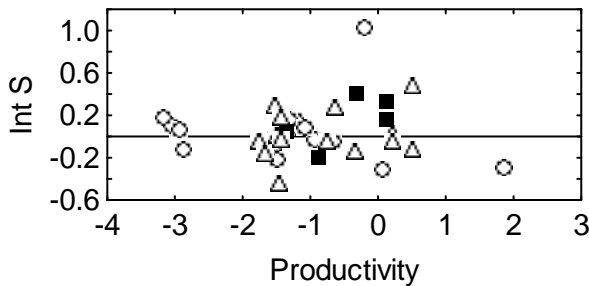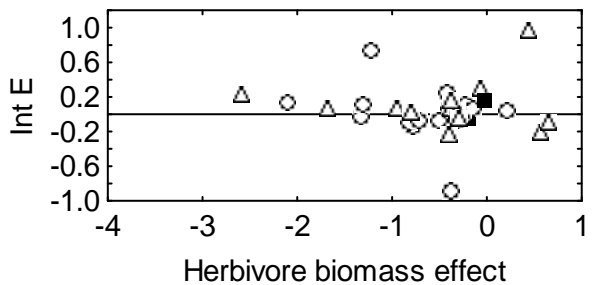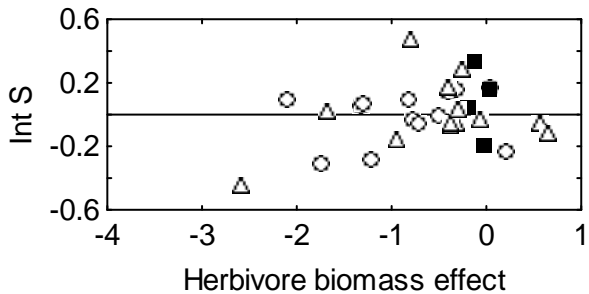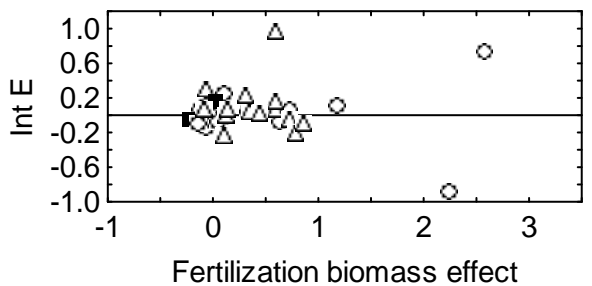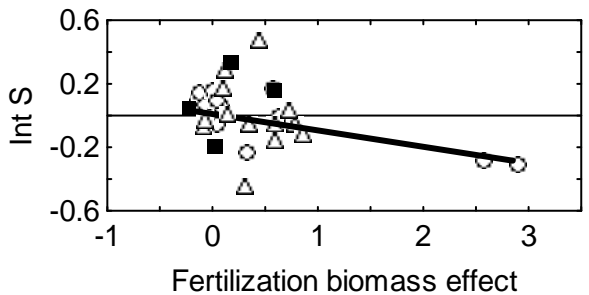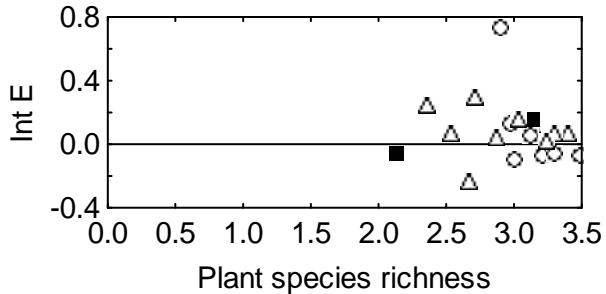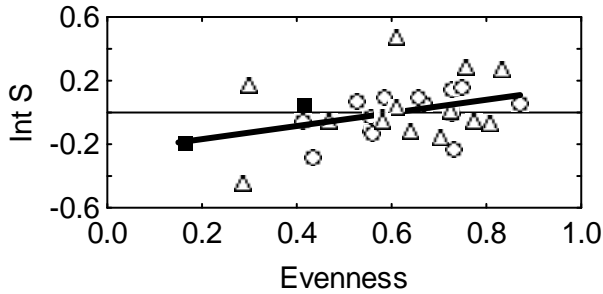

Supplement: pnas_0701918104_5.pdf [file pnas_0701918104_5.pdf]

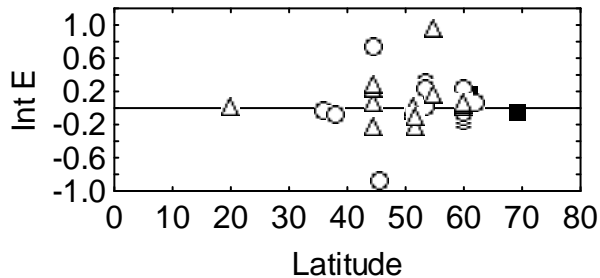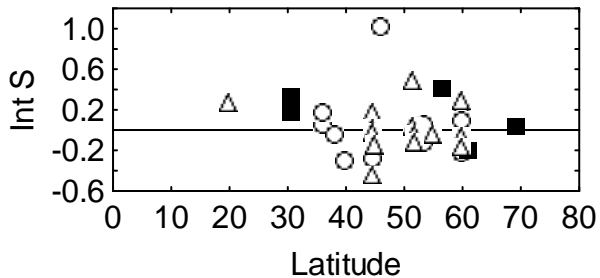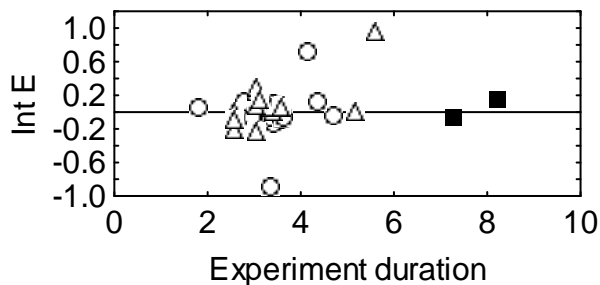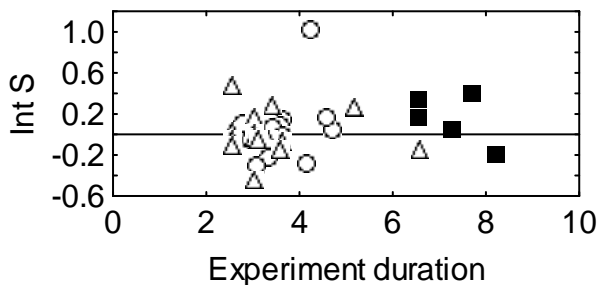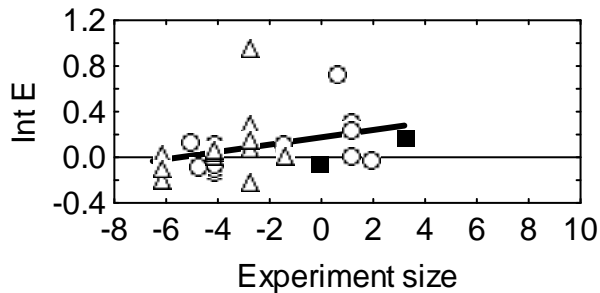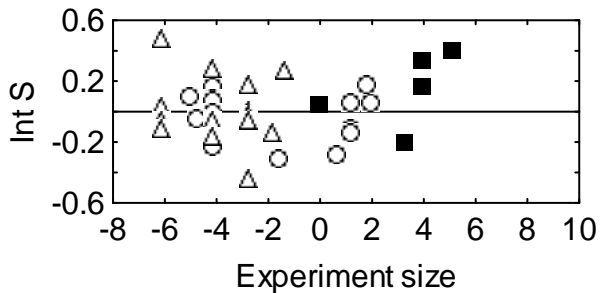

Supplement: pnas_0701918104_6.pdf [file pnas_0701918104_6.pdf]
